# Supplementary material for: Effects of ketoconazole on the pharmacokinetics of doramectin in rabbits
Source: Research Square preprint supplement (doi:10.21203/rs.3.rs-7880017/v1), 2025-11-03
Supplement: Supplementary file 1 [file 6a3d66a9b897a4771a9cdc0a.xlsx]

## Sheet: plasma_raw
Group	Animal_ID	Time_h	Plasma_ng_mL
Control	CON_1	0	0
Control	CON_1	0.5	63.953
Control	CON_1	1	135.015
Control	CON_1	2	97.731
Control	CON_1	4	118.46
Control	CON_1	8	29.148
Control	CON_1	12	11.853
Control	CON_1	24	0.856
Control	CON_1	48	0.004
Control	CON_1	72	0
Control	CON_1	120	0
Control	CON_1	168	0
Control	CON_2	0	0
Control	CON_2	0.5	62.055
Control	CON_2	1	135.736
Control	CON_2	2	128.069
Control	CON_2	4	110.502
Control	CON_2	8	45.963
Control	CON_2	12	14.573
Control	CON_2	24	2.08
Control	CON_2	48	0.014
Control	CON_2	72	0
Control	CON_2	120	0
Control	CON_2	168	0
Control	CON_3	0	0
Control	CON_3	0.5	12.297
Control	CON_3	1	64.669
Control	CON_3	2	87.106
Control	CON_3	4	100.729
Control	CON_3	8	38.835
Control	CON_3	12	33.429
Control	CON_3	24	5.004
Control	CON_3	48	0.071
Control	CON_3	72	0.003
Control	CON_3	120	0
Control	CON_3	168	0
Control	CON_4	0	0
Control	CON_4	0.5	27.039
Control	CON_4	1	141.974
Control	CON_4	2	110.546
Control	CON_4	4	142.231
Control	CON_4	8	32.183
Control	CON_4	12	9.121
Control	CON_4	24	1.095
Control	CON_4	48	0.006
Control	CON_4	72	0
Control	CON_4	120	0
Control	CON_4	168	0
Control	CON_5	0	0
Control	CON_5	0.5	13.766
Control	CON_5	1	45.068
Control	CON_5	2	112.082
Control	CON_5	4	92.697
Control	CON_5	8	33.765
Control	CON_5	12	19.429
Control	CON_5	24	1.807
Control	CON_5	48	0.026
Control	CON_5	72	0
Control	CON_5	120	0
Control	CON_5	168	0
Ketoconazole	KET_1	0	0
Ketoconazole	KET_1	0.5	151.412
Ketoconazole	KET_1	1	64.04
Ketoconazole	KET_1	2	200.174
Ketoconazole	KET_1	4	194.385
Ketoconazole	KET_1	8	121.342
Ketoconazole	KET_1	12	109.079
Ketoconazole	KET_1	24	30.084
Ketoconazole	KET_1	48	3.147
Ketoconazole	KET_1	72	0.504
Ketoconazole	KET_1	120	0.006
Ketoconazole	KET_1	168	0
Ketoconazole	KET_2	0	0
Ketoconazole	KET_2	0.5	25.073
Ketoconazole	KET_2	1	158.551
Ketoconazole	KET_2	2	128.545
Ketoconazole	KET_2	4	127.484
Ketoconazole	KET_2	8	133.238
Ketoconazole	KET_2	12	51.899
Ketoconazole	KET_2	24	19.155
Ketoconazole	KET_2	48	1.398
Ketoconazole	KET_2	72	0.079
Ketoconazole	KET_2	120	0
Ketoconazole	KET_2	168	0
Ketoconazole	KET_3	0	0
Ketoconazole	KET_3	0.5	16.922
Ketoconazole	KET_3	1	40.653
Ketoconazole	KET_3	2	168.776
Ketoconazole	KET_3	4	123.78
Ketoconazole	KET_3	8	70.081
Ketoconazole	KET_3	12	40.363
Ketoconazole	KET_3	24	9.307
Ketoconazole	KET_3	48	0.41
Ketoconazole	KET_3	72	0.011
Ketoconazole	KET_3	120	0
Ketoconazole	KET_3	168	0
Ketoconazole	KET_4	0	0
Ketoconazole	KET_4	0.5	67.891
Ketoconazole	KET_4	1	160.431
Ketoconazole	KET_4	2	109.21
Ketoconazole	KET_4	4	197.917
Ketoconazole	KET_4	8	142.095
Ketoconazole	KET_4	12	85.108
Ketoconazole	KET_4	24	19.788
Ketoconazole	KET_4	48	1.419
Ketoconazole	KET_4	72	0.181
Ketoconazole	KET_4	120	0.001
Ketoconazole	KET_4	168	0
Ketoconazole	KET_5	0	0
Ketoconazole	KET_5	0.5	52.121
Ketoconazole	KET_5	1	43.104
Ketoconazole	KET_5	2	155.396
Ketoconazole	KET_5	4	213.115
Ketoconazole	KET_5	8	114.934
Ketoconazole	KET_5	12	87.6
Ketoconazole	KET_5	24	25.247
Ketoconazole	KET_5	48	2.027
Ketoconazole	KET_5	72	0.187
Ketoconazole	KET_5	120	0.002
Ketoconazole	KET_5	168	0

## Sheet: pk_outputs
Group	Animal_ID	Cmax_ng_mL	Tmax_h	AUC_tlast_ng_h_mL	Kel_1_h	T1_2_h	AUC0_inf_ng_h_mL
Control	CON_1	135.015	1	862.145	0.21931	3.161	862.145
Control	CON_2	135.736	1	994.662	0.20001	3.466	994.662
Control	CON_3	100.729	4	1002.14	0.15519	4.466	1002.14
Control	CON_4	142.231	4	934.075	0.2299	3.015	934.075
Control	CON_5	112.082	2	810.545	0.18093	3.831	810.545
Ketoconazole	KET_1	200.174	2	3000.63	0.08734	7.936	3000.63
Ketoconazole	KET_2	158.551	1	2036.05	0.11478	6.039	2036.05
Ketoconazole	KET_3	168.776	2	1444.45	0.1341	5.169	1444.45
Ketoconazole	KET_4	197.917	4	2557.89	0.10475	6.617	2557.89
Ketoconazole	KET_5	213.115	4	2601.29	0.09942	6.972	2601.29

## Sheet: data_description
Field	Description
Group	Treatment group: Control = doramectin alone; Ketoconazole = ketoconazole + doramectin
Animal_ID	Unique animal identifier
Time_h	Sampling time in hours after doramectin administration
Plasma_ng_mL	Measured plasma concentration (ng/mL) determined by validated HPLC method
Cmax_ng_mL	Maximum observed plasma concentration (ng/mL)
Tmax_h	Time of observed Cmax (hours)
AUC_tlast_ng_h_mL	AUC from 0 to last measured time (ng·h/mL) by trapezoidal rule
Kel_1_h	Estimated terminal elimination rate constant (1/h) from regression of ln(conc) on time (last points)
T1_2_h	Estimated terminal half-life (hours) = ln(2)/Kel
AUC0_inf_ng_h_mL	AUC from 0 to infinity (ng·h/mL): AUC_tlast + C_last/Kel (if Kel available)
